# Supplementary material for: Association between post-transplant red cell distribution width and prognosis of kidney transplant recipients
Source: PubMed Central journal article supplement (PMC5653739; doi:10.1038/s41598-017-13952-6), 2017-10-23
Supplement: 41598_2017_13952_MOESM1_ESM.pdf [file 41598_2017_13952_MOESM1_ESM.pdf]

# **Association between post-transplant red cell distribution width and prognosis of kidney transplant recipients**

Sehoon Park<sup>1</sup>, Young Hoon Kim<sup>2</sup>, Yong Chul Kim<sup>3</sup>, Mi-Yeon Yu<sup>3</sup>, Jung Pyo Lee<sup>4</sup>, Duck Jong Han<sup>2</sup>, Yon Su Kim<sup>1,5</sup>, and Su-Kil Park<sup>6</sup>

## **Author affiliations**

<sup>1</sup>Department of Biomedical Sciences, Seoul National University College of Medicine, Seoul, Korea

<sup>2</sup>Department of Surgery, Asan Medical Center, University of Ulsan College of Medicine, Seoul, Korea

<sup>3</sup>Kidney Research Institute, Seoul National University College of Medicine, Seoul, Korea

<sup>4</sup>Department of Internal medicine, Seoul National University Boramae Medical Center, Seoul National University College of Medicine, Seoul, Korea

<sup>5</sup>Department of Internal Medicine, Seoul National University Hospital, Seoul, Korea

<sup>6</sup>Department of Internal Medicine, Asan Medical Center, University of Ulsan College of Medicine, Seoul, Korea

**Supplementary Table 1.** Clinical characteristics according to the tertile RDW ranges.

|                                              | RDW < 13.4%<br>(n=983) | 14.6% > RDW ≥<br>13.4%<br>(n=1030) | RDW ≥ 14.6%<br>(n=926) | P value |
|----------------------------------------------|------------------------|------------------------------------|------------------------|---------|
| <b>Recipient characteristics</b>             |                        |                                    |                        |         |
| Age (years)                                  | 39 (30-47)             | 43 (34-51)                         | 45 (36-53)             | < 0.001 |
| < 50                                         | 803 (81.7)             | 724 (70.3)                         | 599 (64.7)             |         |
| ≥ 50                                         | 180 (18.3)             | 306 (29.7)                         | 327 (35.3)             |         |
| Sex (male)                                   | 544 (55.3)             | 58.6 (60.4)                        | 595 (64.3)             | < 0.001 |
| Body mass index (kg/m <sup>2</sup> )         | 21.5 (19.8-23.9)       | 22.3 (20.4-24.4)                   | 22.5 (20.4-24.7)       | < 0.001 |
| Cause of ESRD                                |                        |                                    |                        | < 0.001 |
| Primary glomerulopathy                       | 258 (27.8)             | 228 (23.5)                         | 156 (17.9)             |         |
| Diabetic nephropathy                         | 93 (10.0)              | 131 (13.5)                         | 151 (17.4)             |         |
| Hypertensive nephropathy                     | 61 (6.6)               | 69 (7.1)                           | 73 (8.4)               |         |
| Polycystic kidney disease                    | 37 (4.0)               | 36 (3.7)                           | 39 (4.5)               |         |
| Unknown or miscellaneous                     | 480 (51.6)             | 508 (52.1)                         | 452 (41.8)             |         |
| Smoking history                              | 179 (18.2)             | 209 (20.3)                         | 238 (25.7)             | < 0.001 |
| Hypertension history                         | 819 (83.4)             | 862 (83.7)                         | 792 (85.5)             | 0.39    |
| Diabetes mellitus history                    | 125 (12.7)             | 180 (17.5)                         | 195 (21.1)             | < 0.001 |
| Pre-TPL RDW (%)                              | 13.3 (12.7-14.0)       | 13.6 (12.9-14.5)                   | 13.9 (13.1-14.7)       | < 0.001 |
| <b>Laboratory tests at post-TPL 3 months</b> |                        |                                    |                        |         |
| <b>Anemia-related tests</b>                  |                        |                                    |                        |         |
| <sup>a</sup> Hemoglobin (g/dL)               | 12.8 (11.6-13.7)       | 12.3 (11.2-13.4)                   | 11.6 (10.3-12.9)       | < 0.001 |
| <sup>b</sup> Anemia                          | 414 (42.1)             | 565 (54.9)                         | 650 (70.2)             | < 0.001 |
| MCV (fL/red cell)                            | 93.9 (90.4-97.2)       | 94.4 (91.1-98.1)                   | 96.4 (91.6-101.8)      | < 0.001 |
| Iron (μg/dL)                                 | 77 (51-106)            | 76 (44-106)                        | 62 (37-95)             | 0.10    |
| Ferritin (μg/L)                              | 244 (88-375)           | 276 (142-470)                      | 473 (200-866)          | < 0.001 |
| TIBC (μg/dL)                                 | 250 (213-276)          | 235 (201-269)                      | 223 (179-266)          | < 0.001 |
| TSAT (%)                                     | 32.0 (18.1-39.1)       | 29.2 (21.6-44.0)                   | 30.1 (17.8-44.5)       | 0.96    |
| Iron deficiency (< 20 %)                     | 11 (26.8)              | 12 (23.5)                          | 33 (31.7)              | 0.55    |
| Serum creatinine (mg/dL)                     | 1.30 (1.06-1.60)       | 1.20 (1.00-1.52)                   | 1.27 (1.00-1.60)       | 0.06    |
| eGFR (mL/min/1.73m <sup>2</sup> )            | 57.4 (43.0-85.5)       | 57.9 (42.9-84.4)                   | 55.1 (41.2-79.7)       | 0.05    |
| ≥ 60                                         | 455 (46.3)             | 479 (46.6)                         | 396 (42.9)             |         |
| 30-60                                        | 451 (45.9)             | 466 (45.4)                         | 437 (47.3)             |         |
| < 30                                         | 77 (7.8)               | 82 (8.0)                           | 90 (9.8)               |         |
| Albumin (g/dL)                               | 4.2 (3.9-4.4)          | 4.0 (3.8-4.3)                      | 3.9 (3.6-4.2)          | < 0.001 |
| Hypoalbuminemia (<3.0 g/dL)                  | 5 (0.5)                | 7 (0.8)                            | 40 (4.7)               | < 0.001 |
| <b>Donor characteristics</b>                 |                        |                                    |                        |         |
| Age (years)                                  | 39 (30-48)             | 40 (30-48)                         | 40 (31-49)             | 0.52    |
| Sex (male)                                   | 402 (41.9)             | 434 (42.9)                         | 393 (43.8)             | 0.72    |

|                                 |            |            |            |         |
|---------------------------------|------------|------------|------------|---------|
| Donor relationship              |            |            |            | 0.09    |
| Living related                  | 540 (55.3) | 533 (52.5) | 453 (49.7) |         |
| Living unrelated                | 220 (22.5) | 253 (24.9) | 220 (24.1) |         |
| Deceased                        | 216 (22.1) | 230 (22.6) | 239 (26.2) |         |
| TPL related characteristics     |            |            |            |         |
| ABO mismatch                    | 81 (8.4)   | 65 (6.4)   | 67 (7.4)   | 0.26    |
| Positive cross-match            | 39 (4.0)   | 31 (3.0)   | 25 (2.7)   | 0.26    |
| Acute rejection within 3 months | 58 (5.9)   | 92 (8.9)   | 96 (10.4)  | 0.001   |
| Number of HLA mismatch          |            |            |            | 0.003   |
| Full match                      | 123 (13.1) | 96 (9.7)   | 75 (8.4)   |         |
| Mismatch 1-3                    | 483 (51.5) | 512 (51.8) | 439 (49.4) |         |
| Mismatch 4-6                    | 332 (35.4) | 380 (38.5) | 375 (42.2) |         |
| Medication use of               |            |            |            |         |
| Tacrolimus                      | 523 (53.2) | 465 (45.1) | 373 (40.3) | < 0.001 |
| Cyclosporine                    | 408 (41.5) | 476 (46.2) | 429 (46.3) | 0.05    |
| Azathioprine                    | 118 (12.0) | 157 (15.2) | 158 (17.1) | 0.007   |
| Induction therapy               | 553 (56.3) | 531 (51.6) | 553 (59.7) | 0.001   |

RDW, red cell distribution width, TPL, transplantation, ESRD, end-stage renal disease, MCV, mean corpuscle volume, TIBC, total iron binding capacity, TSAT, transferrin saturation, eGFR, estimated glomerular filtration rate, HLA, human leukocyte antigen.

Categorical variables were presented as n (%), and continuous variables were shown as median scores (interquartile ranges).

<sup>a</sup>The hemoglobin values were measured in the same complete blood cell panel exam which reported the RDW values.

<sup>b</sup>Presence of anemia was defined with hemoglobin level < 12 g/dL for women and < 13g/dL for men.

**Supplementary Table 2.** Risk of composite graft loss of patients with RDW increment, in subgroups divided by presence of post-transplant anemia.

|                                            | Univariable analyses |         | Multivariable analyses            |         |
|--------------------------------------------|----------------------|---------|-----------------------------------|---------|
|                                            | HR (95% CI)          | P       | <sup>a</sup> Adjusted HR (95% CI) | P       |
| <sup>b</sup> Subgroup w/o anemia (n= 1310) |                      |         |                                   |         |
| Increased RDW (> 14.9%)                    | 1.87 (1.40-2.50)     | < 0.001 | 1.58 (1.16-2.17)                  | 0.003   |
| Higher RDW (1 % increment)                 | 1.17 (1.10-1.25)     | < 0.001 | 1.15 (1.06-1.24)                  | < 0.001 |
| <sup>b</sup> Subgroup /w anemia (n= 1629)  |                      |         |                                   |         |
| Increased RDW (> 14.9%)                    | 1.97 (1.22-3.18)     | 0.005   | 1.51 (1.04-2.82)                  | 0.03    |
| Higher RDW (1 % increment)                 | 1.21 (1.08-1.36)     | 0.001   | 1.20 (1.05-1.37)                  | 0.007   |

HR, hazard ratio, CI, confidence interval, RDW, red cell distribution width

Missing data was imputed by multiple imputation by classification and regression trees (CART) method. Hazard ratio and associated confidence of each characteristic was shown. Laboratory values at post-TPL 3 month were used.

<sup>a</sup>Adjusted for baseline characteristics which showed significant differences in patients with increased (> 14.9 %) RDW levels; age (continuous, years), sex, body mass index, smoking history, decreased eGFR (categorical, <30, ≥30), primary glomerulopathy as the cause of ESRD, hemoglobin (continuous, mg/dL), hypoalbuminemia (categorical, serum albumin < 3.0 g/dL), presence of acute rejection (within post-TPL 3 month), donor relationship (deceased or living), number of HLA mismatch (continuous, one antigen increment), whether induction therapy was performed, use of tacrolimus.

<sup>b</sup>Presence of post-TPL anemia was defined by hemoglobin level < 12 g/dL for women and < 13 g/dL for men, and the hemoglobin values were from the same complete blood cell panel exam which reported the RDW levels.

**Supplementary Table 3.** Risk of composite graft loss of patients with RDW increment, in subgroups divided by usage of RBC transfusion or erythropoietin treatment.

|                                                                    | Univariable analyses |         | Multivariable analyses            |       |
|--------------------------------------------------------------------|----------------------|---------|-----------------------------------|-------|
|                                                                    | HR (95% CI)          | P       | <sup>a</sup> Adjusted HR (95% CI) | P     |
| Subgroup /w RBC transfusion or erythropoietin treatment (n= 941)   |                      |         |                                   |       |
| Increased RDW (> 14.9%)                                            | 2.09 (1.47-2.97)     | < 0.001 | 1.59 (1.07-2.37)                  | 0.02  |
| Higher RDW (1 % increment)                                         | 1.18 (1.09-1.28)     | < 0.001 | 1.13 (1.02-1.26)                  | 0.02  |
| Subgroup w/o RBC transfusion or erythropoietin treatment (n= 1998) |                      |         |                                   |       |
| Increased RDW (> 14.9%)                                            | 1.85 (1.33-2.57)     | < 0.001 | 1.49 (1.04-2.13)                  | 0.03  |
| Higher RDW (1 % increment)                                         | 1.19 (1.10-1.29)     | < 0.001 | 1.16 (1.06-1.27)                  | 0.002 |

HR, hazard ratio, CI, confidence interval, RDW, red cell distribution width

Missing data was imputed by multiple imputation by classification and regression trees (CART) method. Hazard ratio and associated confidence of each characteristic was shown. RDW values at post-TPL 3 month were used, and treatment history with RBC transfusion or erythropoietin within 3 months after TPL was implemented to divide the subgroups.

<sup>a</sup>Adjusted for baseline characteristics which showed significant differences in patients with increased (> 14.9 %) RDW levels; age (continuous, years), sex, body mass index, smoking history, decreased eGFR (categorical, <30, ≥30), primary glomerulopathy as the cause of ESRD, hemoglobin (continuous, mg/dL), hypoalbuminemia (categorical, serum albumin < 3.0 g/dL), presence of acute rejection (within post-TPL 3 month), donor relationship (deceased or living), number of HLA mismatch (continuous, one antigen increment), whether induction therapy was performed, use of tacrolimus.

**Supplementary table 4.** The association between post-TPL hemoglobin levels and DWGF/DCGF.

|                                          | Univariable analyses |         | Complete case analyses            |      | <sup>a</sup> Models with missing imputation |      |
|------------------------------------------|----------------------|---------|-----------------------------------|------|---------------------------------------------|------|
|                                          | HR (95% CI)          | P       | <sup>b</sup> Adjusted HR (95% CI) | P    | <sup>b</sup> Adjusted HR (95% CI)           | P    |
| DWGF                                     |                      |         |                                   |      |                                             |      |
| <sup>c</sup> Hemoglobin increment 1 g/dL |                      |         |                                   |      |                                             |      |
| Values at 3 months after TPL             | 0.82 (0.74-0.91)     | < 0.001 | 0.92 (0.80-1.06)                  | 0.22 | 0.93 (0.81-1.05)                            | 0.25 |
| <sup>d</sup> Time-averaged, 3-12 months  | 0.88 (0.76-1.01)     | 0.08    | 0.91 (0.76-1.08)                  | 0.27 | 0.91 (0.71-1.08)                            | 0.27 |
| DCGF                                     |                      |         |                                   |      |                                             |      |
| <sup>c</sup> Hemoglobin increment 1 g/dL |                      |         |                                   |      |                                             |      |
| Values at 3 months after TPL             | 0.93 (0.86-0.99)     | 0.03    | 0.95 (0.87-1.04)                  | 0.28 | 0.96 (0.89-1.04)                            | 0.35 |
| <sup>d</sup> Time-averaged, 3-12 months  | 0.91 (0.83-0.97)     | 0.007   | 0.90 (0.82-0.99)                  | 0.03 | 0.90 (0.82-0.98)                            | 0.02 |

HR, hazard ratio, CI, confidence interval, DWGF, death-with-graft-function, DCGF, death-censored graft failure, TPL, transplantation

<sup>a</sup>Multiple imputation by CART (classification and regression trees) was performed to impute the missing data.

<sup>b</sup>Adjusted for age (continuous, years), sex, smoking history, eGFR (categorical, <30, 30-60, ≥60), post-transplant RDW (continuous, %), hypoalbuminemia (categorical, serum albumin < 3.0 g/dL), presence of acute rejection (within post-TPL 3 month), baseline diabetes mellitus, hypertension, whether induction therapy was performed, medication use of tacrolimus, donor relationship (deceased)

<sup>c</sup>The hemoglobin values were measured in the same complete blood cell panel exam which reported the RDW values.

<sup>d</sup>Calculated time-averaged values (hemoglobin, eGFR, albumin and RDW) between 3-12 months from operation were used in the analyses. In the analyses using the time-averaged values, the mortality or graft failure cases before 12 months were not included.

**Supplementary table 5.** Association of RDW change from pre-transplantation to post-transplant 3 months with kidney transplantation prognosis.

| Effect of 1% increment of RDW change | Univariable analyses |         | <sup>a</sup> Multivariable analyses – model 1. |         | <sup>b</sup> Multivariable analyses – model 2. |         |
|--------------------------------------|----------------------|---------|------------------------------------------------|---------|------------------------------------------------|---------|
|                                      | HR (95% CI)          | P       | Adjusted HR (95% CI)                           | P       | Adjusted HR (95% CI)                           | P       |
| On DWGF                              | 1.25 (1.15-1.36)     | < 0.001 | 1.17 (1.06-1.28)                               | 0.002   | 1.18 (1.08-1.30)                               | < 0.001 |
| On DCGF                              | 1.16 (1.09-1.24)     | < 0.001 | 1.15 (1.07-1.23)                               | < 0.001 | 1.17 (1.09-1.26)                               | < 0.001 |

HR, hazard ratio, CI confidence interval, RDW, red cell distribution width, DWGF, death-with-graft-function, DCGF, death-censored graft failure

Those without available pre-TPL RDW levels (59 cases) were not considered in the analyses.

For missing values, multiple imputation by CART (classification and regression trees) method was performed.

<sup>a</sup>Adjusted for age (continuous, years), sex, smoking history, eGFR (categorical, <30, 30-60, ≥60), post-transplant RDW (continuous, %), hypoalbuminemia (categorical, serum albumin < 3.0 g/dL), presence of acute rejection (within post-TPL 3 month), baseline diabetes mellitus, hypertension, whether induction therapy was performed, medication use of tacrolimus, donor relationship (deceased)

<sup>b</sup>Adjusted for same variables as model 1, except for that hemoglobin change from pre-transplant period to 3 months after surgery was adjusted rather than the absolute hemoglobin level at post-transplant 3 months.

**Supplementary table 6.** Difference of iron, ferritin, TIBC, TSAT levels according to presence of increased RDW at pre- or post-transplantation period.

|                                                     | Pre/post-TPL<br>RDW ≤ 14.9 %<br>(N=1941) | only pre-TPL<br>RDW > 14.9 %<br>(N=319) | only post-TPL<br>RDW > 14.9 %<br>(N=547) | Pre/post-TPL<br>RDW > 14.9 %<br>(N=132) | P       |
|-----------------------------------------------------|------------------------------------------|-----------------------------------------|------------------------------------------|-----------------------------------------|---------|
| Post-transplant 3 months                            |                                          |                                         |                                          |                                         |         |
| Iron (µg/dL)                                        | 77.5 (50.0-111.0)                        | 53.0 (37.0-79.0)                        | 68.0 (40.5-94.5)                         | 45.0 (36.0-105.0)                       | 0.02    |
| Ferritin (µg/L)                                     | 269.0 (158.5-470.4)                      | 216.0 (71.5-393.9)                      | 630 (230.4-1017.0)                       | 388.1 (112.0-805.3)                     | < 0.001 |
| TIBC (µg/dL)                                        | 241.0 (208.0-272.0)                      | 257.0 (201.5-279.0)                     | 217.0 (182.0-261.0)                      | 230.0 (158.0-259.0)                     | 0.005   |
| TSAT (%)                                            | 31.4 (21.1-45.6)                         | 28.7 (13.8-31.9)                        | 31.3 (19.2-47.5)                         | 20.1 (15.1-40.1)                        | 0.08    |
| Iron deficiency (< 20%)                             | 20 (22.5)                                | 8 (38.1)                                | 17 (26.6)                                | 11 (50.0)                               | 0.05    |
| Time-averaged values in post-transplant 3-12 months |                                          |                                         |                                          |                                         |         |
| Iron (µg/dL)                                        | 72.0 (44.2-100.0)                        | 63.0 (49.1-87.2)                        | 73.0 (46.0-104.0)                        | 47.5 (37.0-105.0)                       | 0.64    |
| Ferritin (µg/L)                                     | 228.0 (90.5-464.8)                       | 220.5 (87.5-426.9)                      | 547.0 (201.3-957.0)                      | 332.2 (94.2-1050.9)                     | < 0.001 |
| TIBC (µg/dL)                                        | 242.0 (206.0-276.0)                      | 248.5 (197.5-278.0)                     | 217.0 (179.6-254.0)                      | 231.5 (174.0-266.5)                     | 0.001   |
| TSAT (%)                                            | 27.5 (18.5-40.2)                         | 29.6 (19.7-36.3)                        | 32.9 (21.1-54.1)                         | 21.9 (15.1-43.0)                        | 0.20    |
| Iron deficiency (< 20%)                             | 52 (29.9)                                | 10 (25.6)                               | 24 (23.5)                                | 11 (36.7)                               | 0.47    |

RDW, red cell distribution width, TPL, transplantation, TIBC, total iron binding capacity, TSAT, transferrin saturation

Categorical variables were presented as n (%), and continuous variables were shown as median scores (interquartile ranges).



**Supplementary table 7.** Documented post-TPL complications in the study population.

|                               | Pre/post-TPL<br>RDW $\leq$ 14.9 %<br>(N=1941) | only pre-TPL<br>RDW > 14.9 %<br>(N=319) | only post-TPL<br>RDW > 14.9 %<br>(N=547) | Pre/post-TPL<br>RDW > 14.9 %<br>(N=132) | P       |
|-------------------------------|-----------------------------------------------|-----------------------------------------|------------------------------------------|-----------------------------------------|---------|
| N of patients with infection  |                                               |                                         |                                          |                                         |         |
| Urinary tract infection       | 151 (7.8)                                     | 20 (6.3)                                | 73 (13.4)                                | 11 (8.3)                                | < 0.001 |
| Pneumonia                     | 74 (3.8)                                      | 3 (0.9)                                 | 45 (8.2)                                 | 11 (8.3)                                | < 0.001 |
| Cytomegalovirus               | 55 (2.8)                                      | 8 (2.5)                                 | 52 (9.5)                                 | 5 (3.8)                                 | < 0.001 |
| BK virus or parvovirus        | 31 (1.6)                                      | 8 (2.6)                                 | 16 (2.9)                                 | 1 (0.8)                                 | 0.13    |
| N of patients with malignancy | 42 (2.2)                                      | 4 (1.3)                                 | 17 (3.1)                                 | 4 (3.0)                                 | 0.30    |

RDW, red cell distribution width, TPL, transplantation

Categorical variables were presented as n (%).

**Supplementary Figure 1.** Post-transplant prognoses according to tertile RDW ranges.

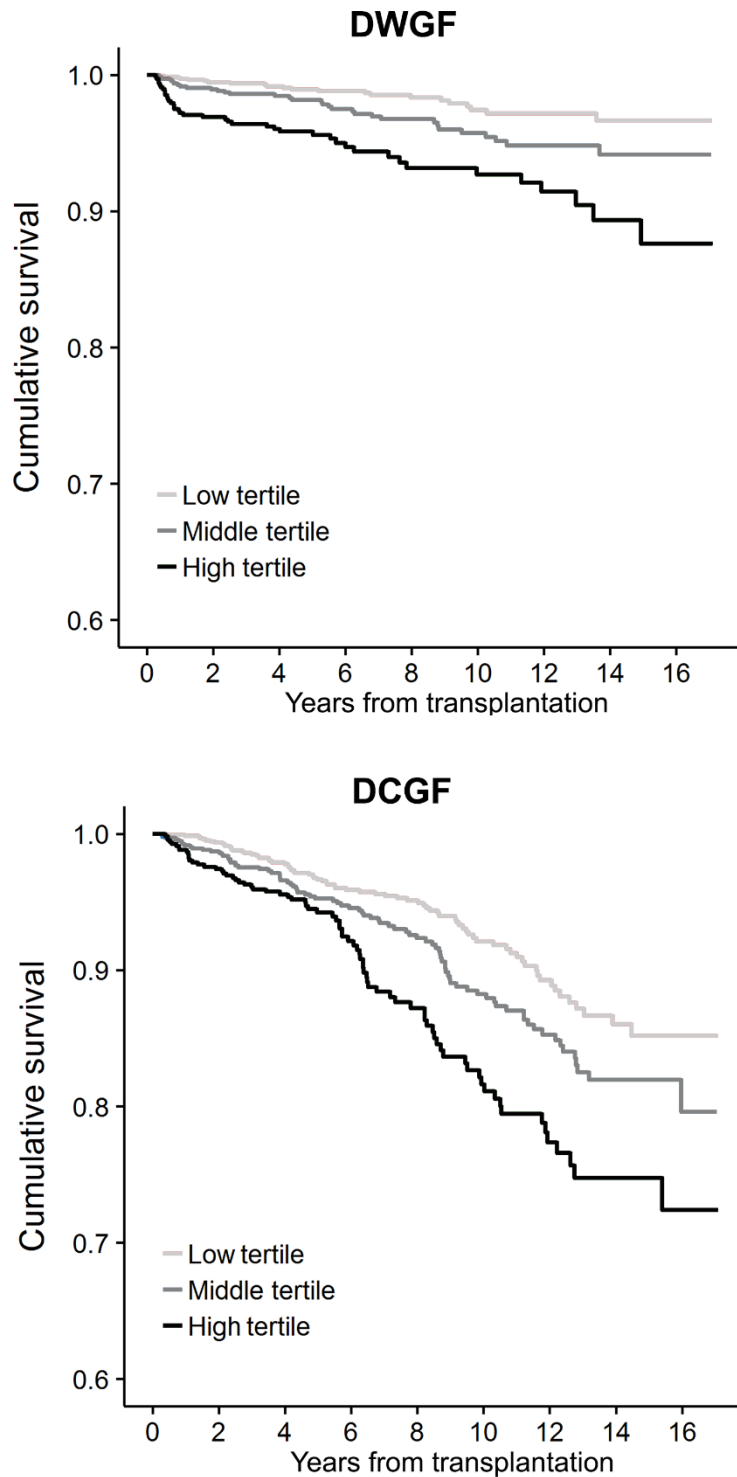

Cumulative survival curve of the study population, y-axis indicated the cumulative survival and x-axis indicated the years from transplantation. The upper graph shows the DWGF, and the lower graph shows the DCGF. Black lines, dark grey lines, and light grey lines indicate the survival curve of patients with high tertile ( $\geq 14.6$ ), middle tertile ( $< 14.6$  and  $\geq 13.4$ ), and low tertile ( $< 13.4$ ) RDW ranges, respectively. RDW, red cell distribution width; DWGF, death-with-graft-function, DCGF, death-censored-graft-failure.
